# Supplementary material
Source: MDPI journal article supplement (https://www.mdpi.com/1999-4907/11/3/340)
Supplement: s1 [file s1]

**Supplementary information**

# Methods:

# 1 Copula-based method

### 1.1 Kolmogorov-Smirnov test

The Kolmogorov-Smirnov test (K-S test) is a nonparametric test that measures the overall difference between the empirical distribution of the sample and the cumulative distribution of the reference distribution [1], as shown in Eqs. 1 and 2. Because the seasonal NDVI, P, and T are continuous variables, some distributions, such as the gamma, generalized extreme value (GEV) lognormal and normal distributions, were applicable in this study. The K-S test was used to identify the most suitable distribution for each NDVI, precipitation and temperature.

The empirical distribution function is defined in Eq. 1 as follows:

(1)

where is the indicator function, equal to 1 if and equal to 0 otherwise.

The K-S test for a given cumulative distribution function is defined in Eq. 2 as follows:

(2)

where is the supremum of the set of the distance. If the sample originates from the distribution , then covers to 0 nearly within the limits when n extends to infinity.

### 1.2 Copula method

Mathematically, given two random variables X and Y with marginal distributions and , respectively, on the interval [0,1], their joint probability distribution can be summarized as a Copula function C [2] as in Eq. 3 as follows:

(3)

where is the parameter of the Copula.

## 2 Composite Granger causality test

### 2.1 Augmented Dickey-Fuller test

The augmented Dickey-Fuller Test (ADF) is a unit root test for stationarity, which can cause unpredictable results in time series analysis. The stability of the sequence of a time series is the premise of the Granger causality test [3]. If the Granger causality test is not directly performed, it may lead to false regression. The results presented by the ADF test are also used to determine the single integer order of the sequence and provide support for subsequent cointegration analysis. When the original sequence is not stable, there may be a cointegration relationship or the possibility of a long-term equilibrium between the sequences. The ADF test was used here to examine whether the different series of the NDVI, precipitation, and temperature are stable and determine whether a cointegration relationship exists.

(4)

where is a time variable; is a constant; are trend parameters; is the residual; is the lag length; and is the maximum lag length.

### 2.2 Engle-Granger cointegration test

The Engle-Granger cointegration theory was first proposed by Engle and Granger [4]. Prior to this, to avoid false regressions, non-stationary time series sequences were often denied conducting a regression model or needed to first be converted to stationary sequences. Using the cointegration theory, the long-term stable relationship between several time series sequences has been recognized.

### 2.3 Vector autoregression model

The vector autoregressive (VAR) model is a commonly used econometric model. It was proposed by Christopher Sims in 1980 [5]. The VAR model is used to estimate the dynamic relationship of joint endogenous variables without any prior constraints. The basic theory is defined in Eq. 5 as follows:

(5)

where is an constant vector, is an matrix, and is an error vector.

### 2.4 Granger causality test

Granger's causality is different from the actual definition of causality; it can provide data-based inferences for analyzing the interactions between variables and provide rich decision support for analyzing causal relationships between two variables. In the case of a time series sequence, the Granger causality test between two variables X and Y is defined as follows: if the prediction of Y, based on past information, has been improved by taking variable X as a predictor, then X is recognized to be the Granger cause for the Y variable. The Granger causality test is defined in Eq. 6 as follows:

(6)

where is the trend parameter of time series data X, is the trend parameter of time series data Y, is the maximum lag length of variables X and Y, is a constant, and is the residual.

# Supplementary 1:

**Table S1** Kolmogorov-Smirnov test for marginal distribution

| Seasons | Sub-watersheds | Series | p-value | | | |
| --- | --- | --- | --- | --- | --- | --- |
| Gamma Distribution | GEV Distribution | Lognormal Distribution | Normal Distribution |
| Late Spring | Upstream | NDVI | 0.000 | 0.000 | 0.000 | 0.000 |
| T | 0.004 | 0.031 | 0.005 | 0.005 |
| P | **0.976** | 0.823 | 0.852 | 0.469 |
| Midstream | NDVI | 0.001 | 0.003 | 0.001 | 0.001 |
| T | 0.005 | 0.014 | 0.007 | 0.006 |
| P | **0.844** | 0.571 | 0.000 | 0.372 |
| Downstream | NDVI | 0.001 | 0.001 | 0.001 | 0.001 |
| T | 0.020 | 0.016 | 0.017 | 0.123 |
| P | **0.935** | 0.872 | 0.000 | 0.226 |
| Summer | Upstream | NDVI | 0.090 | 0.456 | 0.114 | 0.114 |
| T | 0.981 | **0.987** | 0.978 | 0.815 |
| P | 0.899 | **0.972** | 0.000 | 0.093 |
| Midstream | NDVI | 0.000 | **0.684** | 0.133 | 0.132 |
| T | **0.990** | 0.991 | 0.983 | 0.819 |
| P | **0.982** | 0.961 | 0.970 | 0.508 |
| Downstream | NDVI | 0.000 | **0.884** | 0.149 | 0.141 |
| T | 0.846 | 0.776 | 0.857 | 0.985 |
| P | 0.948 | **0.998** | 0.989 | 0.229 |
| Early Autumn | Upstream | NDVI | 0.000 | 0.000 | 0.000 | 0.000 |
| T | 0.012 | 0.004 | 0.012 | 0.011 |
| P | **1.000** | 0.985 | 0.992 | 0.193 |
| Midstream | NDVI | 0.000 | 0.000 | 0.000 | 0.000 |
| T | 0.002 | 0.003 | 0.001 | 0.002 |
| P | 0.884 | **0.985** | 0.000 | 0.049 |
| Downstream | NDVI | 0.026 | 0.004 | 0.011 | 0.025 |
| T | 0.003 | 0.002 | 0.002 | 0.010 |
| P | **0.991** | 0.954 | 0.000 | 0.525 |

# Supplementary 2:

**Table S2** The results of Engle-Granger cointegration test in the midstream

|  |  | Coefficient | t-Statistic | prob | Durbin-Watson stat | Conclusion |
| --- | --- | --- | --- | --- | --- | --- |
| Midstream | NDVI-T | 0.014 | 41.69 | 0 | **1.56** | Non-Accept |
| NDVI-P | 0.003 | 27.408 | 0 | **1.89** | Accept |

References

1. Kharin, V.V.; Zwiers, F.W. Changes in the Extremes in an Ensemble of Transient Climate Simulations with a Coupled Atmosphere–Ocean GCM. *J. Climate* **2000**, *13*, 3760–3788, doi:10.1175/1520-0442(2000)013<3760:CITEIA>2.0.CO;2.

2. Hao, Z.; Singh, V.; Hao, F. Compound Extremes in Hydroclimatology: A Review. *Water* **2018**, *10*, 718, doi:10.3390/w10060718.

3. Cheung, Y.-W.; Lai, K.S. Lag Order and Critical Values of the Augmented Dickey–Fuller Test. *Journal of Business & Economic Statistics* **1995**, *13*, 277–280, doi:10.1080/07350015.1995.10524601.

4. Engle, R.F.; Granger, C.W.J. Co-Integration and Error Correction: Representation, Estimation, and Testing. *Econometrica* **1987**, *55*, 251, doi:10.2307/1913236.

5. Sims, C.A. Macroeconomics and Reality. *Econometrica* **1980**, *48*, 1, doi:10.2307/1912017.
